# Supplementary material for: A backside fluorine-functionalized graphene layer for ammonia detection
Source: Royal Society of Chemistry journal article supplement (doi:10.1039/c4cp03552f), 2014-10-27
Supplement: c4cp03552f1.pdf [file c4cp03552f1.pdf]

## Supplementary Information

### Backside fluorine-functionalized graphene layer for ammonia detection

*M.V. Katkov<sup>1,2</sup>, V.I. Sysoev<sup>1</sup>, A.V. Gusel'nikov<sup>1</sup>, I.P. Asanov<sup>1,2</sup>, L.G. Bulusheva<sup>1,2</sup>,  
A.V. Okotrub<sup>1,2</sup>*

<sup>1</sup>Nikolaev Institute of Inorganic Chemistry SB RAS, 3 Acad. Lavrentiev Ave., 630090  
Novosibirsk, Russian Federation

<sup>2</sup>Novosibirsk State University, 2 Pirogova Str., 630090 Novosibirsk, Russian Federation

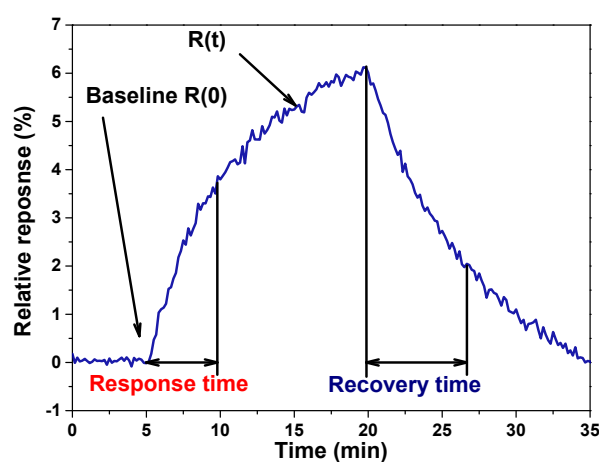

**Figure S1.** The main stages of the sensor interaction with an analyzing gas.

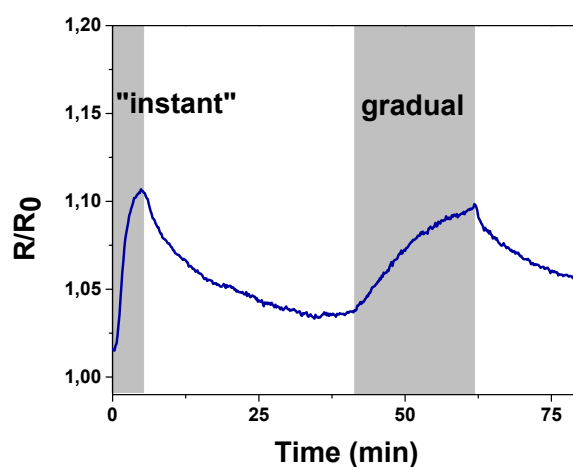

**Figure S2.** Response to 1 % of  $\text{NH}_3$ : first cycle – the sensor placed directly into the atmosphere of ammonia, second cycle – the necessary concentration achieved in a flow reactor.

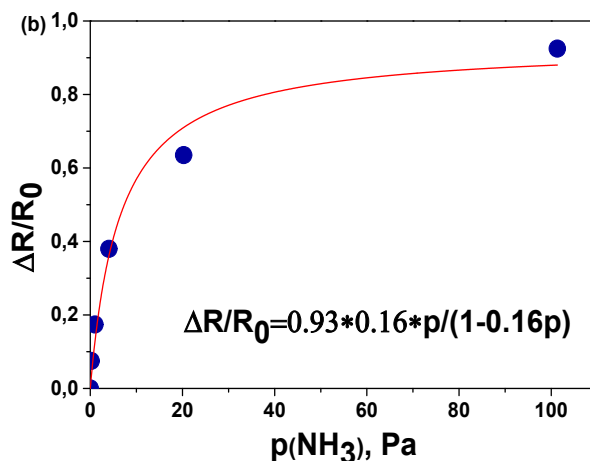

**Figure S3.** Dependence of sensor response of CVD-graphene on the  $\text{NH}_3$  pressure. The curve was plotted using the experimental data presented in Fig. 2(a) in Ref. [F. Yavari, E. Castillio, H. Gullapalli, P.M. Ajayan and N. Koratkar, *Appl. Phys. Lett.*, 2012, **100**, 203120].

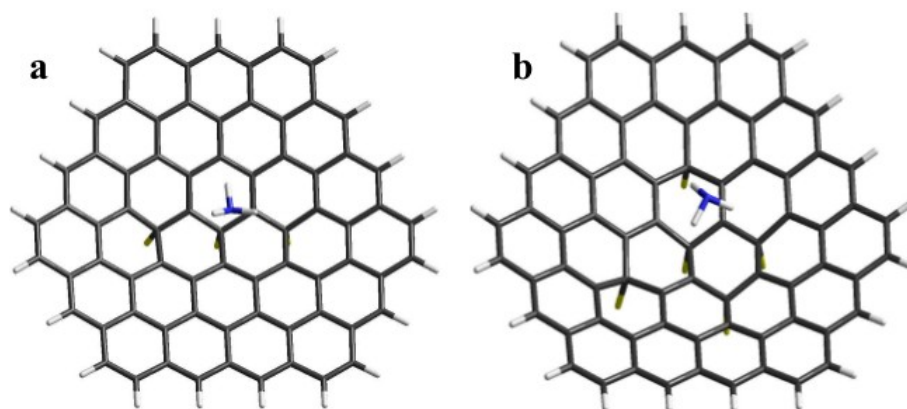

**Figure S4.** Geometry of models  $\text{C}_{73}\text{F}_3\text{H}_{21}$  (a) and  $\text{C}_{73}\text{F}_5\text{H}_{21}$  (b) showing less preferable mutual orientation of  $\text{NH}_3$  molecule relative to fluorinated graphene surface. In the model,  $\text{C}_{73}\text{F}_3\text{H}_{21}$  the molecule approaches by N and H atoms –  $\text{C}_{73}\text{F}_3\text{H}_{21}(\text{NH}_3)$  configuration in Table S1; in the model  $\text{C}_{73}\text{F}_5\text{H}_{21}$ , the molecule approaches by three hydrogen atoms –  $\text{C}_{73}\text{F}_5\text{H}_{21}(\text{H}_3\text{N})$  configuration in Table S1.

| model    | $\text{C}_{73}\text{FH}_{21}$ | $\text{C}_{73}\text{F}_3\text{H}_{21}(\text{H}_3\text{N})$ | $\text{C}_{73}\text{F}_3\text{H}_{21}(\text{NH}_3)$ | $\text{C}_{73}\text{F}_5\text{H}_{21}(\text{H}_3\text{N})$ | $\text{C}_{73}\text{F}_5\text{H}_{21}(\text{NH}_3)$ |
|----------|-------------------------------|------------------------------------------------------------|-----------------------------------------------------|------------------------------------------------------------|-----------------------------------------------------|
| distance | 2.86 (C-H <sub>1</sub> )      | 2.66 (C-H <sub>1</sub> )                                   | 2.96 (C-H)                                          | 2.97 (C-H <sub>1</sub> )                                   | 2.93 (C <sub>1</sub> -H <sub>1</sub> )              |
|          | 2.88 (C-H <sub>2</sub> )      | 2.70 (C-H <sub>2</sub> )                                   | 2.99 (C-N)                                          | 3.00 (C-H <sub>2</sub> )                                   | 2.94 (C <sub>2</sub> -H <sub>1</sub> )              |
|          | 2.90 (C-H <sub>3</sub> )      | 2.87 (C-H <sub>3</sub> )                                   |                                                     | 3.04 (C-H <sub>2</sub> )                                   | 3.06 (C <sub>1</sub> -H <sub>2</sub> )              |

**Table S1** The distance between atoms in a molecule and the nearest surface atoms (Å) for “hydrogen” ( $\text{H}_3\text{N}$ ) or “nitrogen” ( $\text{NH}_3$ ) orientation of the molecule.

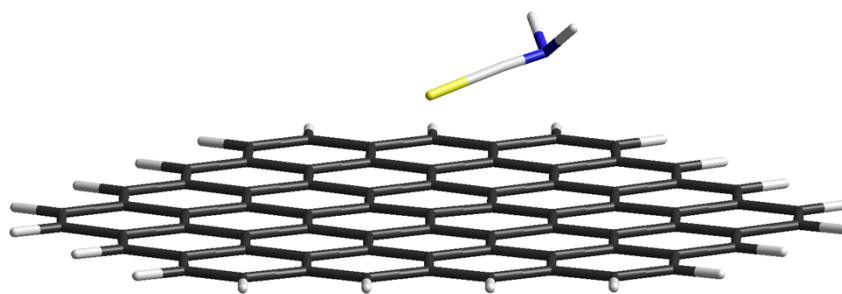

**Figure S5.** Charge-transfer complex of graphene and F–HNH<sub>2</sub> species obtained as the result of interaction of NH<sub>3</sub> molecule with fluorine atom in C<sub>73</sub>FH<sub>21</sub> model. The shortest C–F distance is 2.4 Å. The length of the F–H bond is 1.7 Å that corresponds to hydrogen bonding.
